# Supplementary material for: EULAR recommendations for patient education for people with inflammatory arthritis
Source: HighWire-hosted journal article supplement (doi:10.1136/annrheumdis-2014-206807), 2015-03-04
Supplement: annrheumdis-2014-206807supp2.pdf [file annrheumdis-2014-206807supp2.pdf]

## **Online supplementary file 2: Systematic literature search**

The systematic literature search was conducted by the research fellow (HAZ) and a medical librarian, guided by an epidemiologist (AvT). The following databases were searched: Ovid Medline, EMBASE, Cochrane Library, PsycInfo and CINAHL. Relevant keywords, free text words and terms were selected and defined for a search strategy combining patient education (PE) AND patients with inflammatory arthritis (IA). The search was limited to studies on adults (age  $\geq 18$ ), published between January 2003 and September 2013 (date of search), written in English, German, French or Spanish. No limitations regarding geographical area was applied

### **Systematic reviews and meta-analyses**

A separate search was conducted for systematic reviews and meta-analyses in the databases Ovid Medline and EMBASE. The same search terms were applied as well as the limitations regarding languages and years of publication. However, the studies were not limited to adults because relevant studies may be indexed without age-specifications.

### **Medline search strategy. (The same strategy, with an adjustment to the correct thesaurus, was used in searching the other databases)**

1. exp Behavior Therapy/
2. self management.mp. [mp=title, abstract, original title, name of substance word, subject heading word, keyword heading word, protocol supplementary concept word, rare disease supplementary concept word, unique identifier]
3. exp Health Behavior/
4. cognitive behavioural therapy.mp. [mp=title, abstract, original title, name of substance word, subject heading word, keyword heading word, protocol supplementary concept word, rare disease supplementary concept word, unique identifier]
5. behaviour change.mp. [mp=title, abstract, original title, name of substance word, subject heading word, keyword heading word, protocol supplementary concept word, rare disease supplementary concept word, unique identifier]
6. exp Self Efficacy/
7. exp Relaxation Therapy/
8. Stress, Psychological/
9. stress management.mp. [mp=title, abstract, original title, name of substance word, subject heading word, keyword heading word, protocol supplementary concept word, rare disease supplementary concept word, unique identifier]
10. exp "Power (Psychology)"/
11. empowerment.mp. [mp=title, abstract, original title, name of substance word, subject heading word, keyword heading word, protocol supplementary concept word, rare disease supplementary concept word, unique identifier]
12. exp Counseling/
13. exp Exercise Therapy/

14. exp Health Promotion/
15. exp Information Dissemination/
16. exp Pamphlets/
17. exp Patient Education as Topic/
18. exp Patient Participation/
19. exp Patient-Centered Care/
20. exp Professional-Patient Relations/
21. exp Self Care/
22. exp Teaching/
23. exp Teaching Materials/
24. (educat: adj (patient: or consumer: or health:)).tw.
25. (information adj (patient: or consumer: or health:)).tw.
26. (advice adj (patient: or consumer: or health:)).tw.
27. consumer health information.tw.
28. (shared decisionmaking or informed choice).tw.
29. (patient adj3 education).ti,ab.
30. (patient adj3 information).ti,ab.
31. (education adj2 program\$).ti,ab.
32. (leaflet\$ or booklet\$ or pamphlet\$ or poster\$).ti,ab.
33. ((written or printed or oral) adj3 information).ti,ab.
34. academic detailing.ti,ab.
35. training program\$.ti,ab.
36. (professional patient relation: or physician patient relation: or doctor patient relation: or nurse patient relation: or physical therapist patient relation: or physiotherapist patient relation: or occupational therapist patient relation).tw.
37. (professional patient interaction: or physician patient interaction: or nurse interaction: or physiotherapist patient interaction: or physical therapist patient interaction: or occupational therapist patient interaction).tw.
38. (patient physician communication: or patient doctor communication: or patient nurse communication: or patient physical therapist communication: or patient physiotherapist communication: or patient occupational therapist communication).tw.
39. (patient professional relation: or patient physician relation: or patient doctor relation: or patient nurse relation: or patient physical therapist relation: or patient physiotherapist relation: or patient occupational therapist relation).tw.
40. (patient professional interaction: or patient physician interaction: or patient doctor interaction: or patient nurse interaction: or patient physical therapist interaction: or patient physiotherapist interaction: patient occupational therapist interaction).tw.
41. or/1-40

42. exp arthritis, rheumatoid/
43. ((rheumatoid or reumatoid or revmatoid or rheumatic or reumatic or revmatic or rheumat\$ or reumat\$ or revmarthrit\$) adj3 (arthrit\$ or artrit\$ or diseas\$ or condition\$ or nodule\$)).tw.
44. (felty\$ adj2 syndrome).tw.
45. (caplan\$ adj2 syndrome).tw.
46. still\$ disease.tw.
47. bechterew\$ disease.tw.
48. exp Spondylarthropathies/
49. (ankylos\$ or spondyl\$).tw.
50. (bekhterev\$ or bechterew\$).tw.
51. (Marie adj struempell\$).tw.
52. exp Arthritis, Psoriatic/
53. (psoria\$ adj (arthriti\$ or arthropath\$)).tw.
54. ((arthriti\$ or arthropath\$) adj psoria\$).tw.
55. undifferentiated oligoarthritis.tw.
56. (inflamm\$ adj5 (arthrit\$ or arthrop\$)).tw.
57. or/42-56
58. 41 and 57
59. exp clinical trial/ or comparative study/ or consensus development conference/ or evaluation studies/ or meta-analysis/ or multicenter study/ or twin study/ or validation studies/ or exp epidemiologic study characteristics as topic/
60. study.ti.
61. trial.ti.
62. 59 or 60 or 61
63. 58 and 62
64. limit 63 to "review articles"
65. 63 not 64
66. limit 65 to (french or english or german or spanish)
67. limit 66 to last 10 years
68. limit 67 to ("adult (19 to 44 years)" or "young adult and adult (19-24 and 19-44)" or "middle age (45 to 64 years)" or "middle aged (45 plus years)" or "all aged (65 and over)"
