# Supplementary material for: EULAR recommendations for patient education for people with inflammatory arthritis
Source: HighWire-hosted journal article supplement (doi:10.1136/annrheumdis-2014-206807), 2015-03-04
Supplement: annrheumdis-2014-206807supp3.pdf [file annrheumdis-2014-206807supp3.pdf]

### Online supplementary file 3: Categories of evidence and Strength of recommendations

#### Categories of evidence

---

| Category | Evidence |
|----------|----------|
|----------|----------|

---

|    |                                                                                                     |
|----|-----------------------------------------------------------------------------------------------------|
| 1A | From meta-analysis of randomized controlled trials                                                  |
| 1B | From at least one randomised controlled trial                                                       |
| 2A | From at least one controlled study without randomisation                                            |
| 2B | From at least one type of quasi-experimental study                                                  |
| 3  | From descriptive studies, such as comparative studies, correlation studies, or case control studies |
| 4  | From expert committee reports or opinions and/or clinical experience of respected authorities       |

---

Source: Dougados et al. EULAR standardised operating procedures for the elaboration, evaluation, dissemination, and implementation of recommendations endorsed by the EULAR standing committees. *Ann. Rheum. Dis.* 2004;63(9):1173

#### Strength of recommendations

---

| Strength | Directly based on |
|----------|-------------------|
|----------|-------------------|

---

|   |                                                                                   |
|---|-----------------------------------------------------------------------------------|
| A | Category 1 evidence                                                               |
| B | Category 2 evidence or extrapolated recommendations from Category 1 evidence      |
| C | Category 3 evidence or extrapolated recommendations from Category 1 or 2 evidence |
| D | Category 4 evidence or extrapolated recommendations from Category 2 or 3 evidence |

---

Source: Dougados et al. EULAR standardised operating procedures for the elaboration, evaluation, dissemination, and implementation of recommendations endorsed by the EULAR standing committees. *Ann. Rheum. Dis.* 2004;63(9):1174
